# Supplementary material for: Distinct SoxB1 networks are required for naïve and primed pluripotency
Source: eLife journal article supplement (doi:10.7554/elife.27746), 2017-12-19
Supplement: supp [file elife_poa_e27746_Figure_7_figure_supplement_1.pdf › elife_poa_e27746_Figure_7_figure_supplement_1.pdf]

A

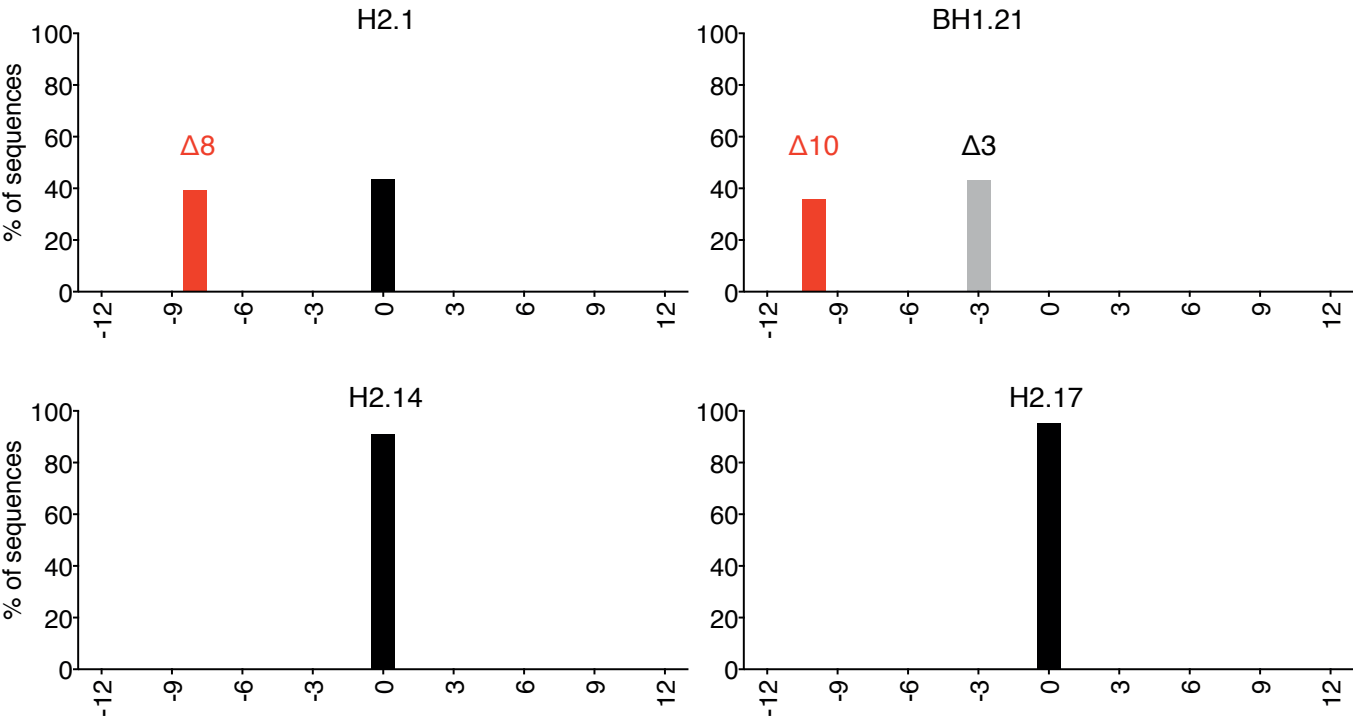

B

| position 1 |                                             | 114                                                                       | 319                                  |
|------------|---------------------------------------------|---------------------------------------------------------------------------|--------------------------------------|
| WT         | MYNMMETELKPPGPQQASGGGGGGGNATAAATGGNQKNSPDRV | KRPMNAFMVWSRGQRRKMAQENPKMHNSEISKRLGAEWKLLSETEKRPFIDEAKRLRALHMKEHPDYKYR... | LSHM                                 |
| H2.1Δ8     | MYNMMETELKPPGPQQASGGGGGGGNATAAATGGNQKNSPDRV | KRPMNAFMVWSRGQRRKMAQENPKMHNSEISKRG                                        | gvetfvrdreaavhrrgqaaarsahgapgl*----- |
| BH1.21Δ3   | MYNMMETELKPPGPQQA-GGGGGGGNATAAATGGNQKNSPDRV | KRPMNAFMVWSRGQRRKMAQENPKMHNSEISKRLGAEWKLLSETEKRPFIDEAKRLRALHMKEHPDYKYR... | LSHM                                 |
| BH1.21Δ10  | MYNMMETELKPPGPr                             | gaaeeatprrrrpaatr                                                         | rtartasrgp*-----                     |
