# Supplementary material for: Distinct SoxB1 networks are required for naïve and primed pluripotency
Source: eLife. 2017 Dec 19;6:e27746. doi: 10.7554/eLife.27746 (PMC5758114; doi:10.7554/eLife.27746)
Supplement: Supplementary file 3. [file elife-27746-supp3.xlsx]

## Sheet: RT-qPCR primers
Supplemenrary file 2: List of the primers used in this study.
RT-qPCR primers
Tbp F	GGGGAGCTGTGATGTGAAGT
Tbp R	CCAGGAAATAATTCTGGCTCA
Sox2 F	CACAGATGCAACCGATGCA
Sox2 R	GGTGCCCTGCTGCGAGTA
Nanog F	AGGATGAAGTGCAAGCGGTG
Nanog R	TGCTGAGCCCTTCTGAATCAG
Oct4 F	GGCGTTCTCTTTGGAAAGGTGTTC
Oct4 R	CTCGAACCACATCCTTCTCT
Sox1 F	GTGACATCTGCCCCCATC
Sox1 R	GAGGCCAGTCTGGTGTCAG
Sox3 F	CAGGAGCAGCTGGGCTAC
Sox3 R	CGTAGCGGTGCATCTGAG
Sox4 F	GGCTGCATCGTTCTCTCC
Sox4 R	GAGTCCGCACCTTGTAGACG
Sox11 F	GTGGCGGTCAGGATAAAGAG
Sox11 R	TCTCAGCGCCACATCTCTC
Sox15 F	CCCCCAACTATTCGACAGC
Sox15 R	GAGGGAAGGTGCATGGTAAG
Nr5a2 F	GGGAAGGAAGGGACAATCTT
Nr5a2R	GCGAGACTCAGGAGGTTGTT
Mash1 F	TCTCCTGGGAATGGACTTTG
Mash1 R	CGTTGGCGAGAAACACTAAAG
Pax6 F	GTTCCCTGTCCTGTGGACTC
Pax6 R	ACCGCCCTTGGTTAAAGTCT
T (Brachyury) F	GGACCCCAATGCCATGTACT
T (Brachyury) R	TTCCAGCGGTGGTTGTCA
CAG exon F	AGTCGCTGCGTTGCCTTC
CAG exon R	CAGCACAATAACCAGCACGT
Genotyping primers
Sox2 a	GATATCAAGATTTCAAGAGATGTTCTTTTATCGTCATC
Sox2 b	CAAAGTATGAATGAATTATGATTGTCCGCG
Sox2 c	GTCAGATATGCCAAGCCCCTTCCTTG
Sox3 for	TTGGTGGTCTCAGAGCGGGTCTC
Sox3 rev	GGTGGAGGCATTGCAGTTCTTGG
CRISPR gRNAs
CRISPR deletion
Sox3 up	AGGTATATAAGGGACCGGGC
Sox3 down	AAGTTTGGCCGTAACTGTCG
CRISPR indels
Sox2 indel	AACGCCACGGCGGCGGCGAC
Sox3 indel1	GTTGCCTGCGTTCGCTCCGC
Sox3 indel2	GGAGCGAACGCAGGCAACGG
Southern Blot primers
5' of Sox2 gene F	AAGGGCTTGGGTTTGTTTTT
5' of Sox2 gene R	TACCACTGCTGTTGCTGTCC
3' of Sox2 gene F	ATGTGGGAGGCTTTGAGAGA
3' of Sox2 gene R	TTGTGAGATTCTGGGGCCAT
MC1-HSVtk (internal) F	TGAAACTCCCGCACCTCTTC
MC1-HSVtk (internal) R	CTGCAGATACCGCACCGTAT

## Sheet: Genotyping primers
Sox2 a	GATATCAAGATTTCAAGAGATGTTCTTTTATCGTCATC
Sox2 b	CAAAGTATGAATGAATTATGATTGTCCGCG
Sox2 c	GTCAGATATGCCAAGCCCCTTCCTTG
Sox3 for	TTGGTGGTCTCAGAGCGGGTCTC
Sox3 rev	GGTGGAGGCATTGCAGTTCTTGG
