# Supplementary figures and images for: Distinct SoxB1 networks are required for naïve and primed pluripotency
Source: eLife journal article supplement (doi:10.7554/elife.27746), 2017-12-19

A

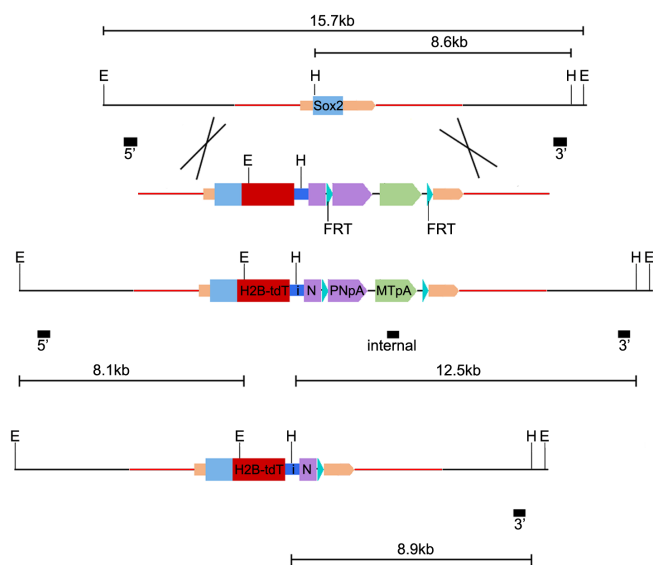

B

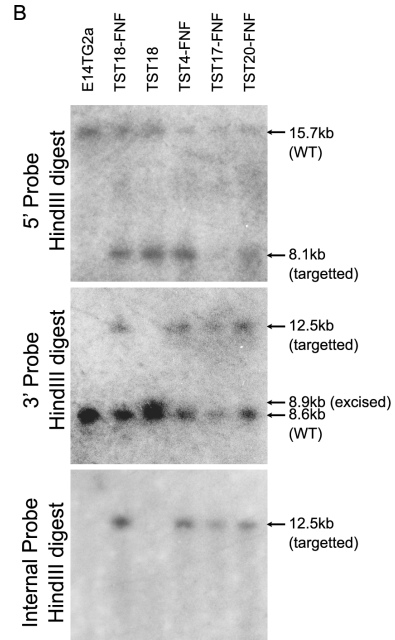

Supplement: supp [file elife_poa_e27746_Figure_1_figure_supplement_1.pdf › elife_poa_e27746_Figure_1_figure_supplement_1.pdf]

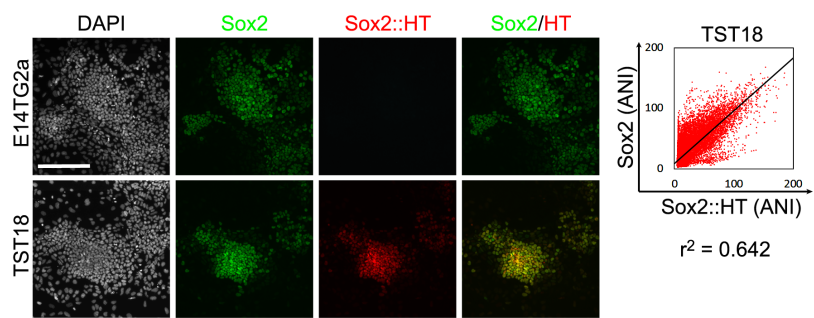

Supplement: supp [file elife_poa_e27746_Figure_1_figure_supplement_2.pdf › elife_poa_e27746_Figure_1_figure_supplement_2.pdf]

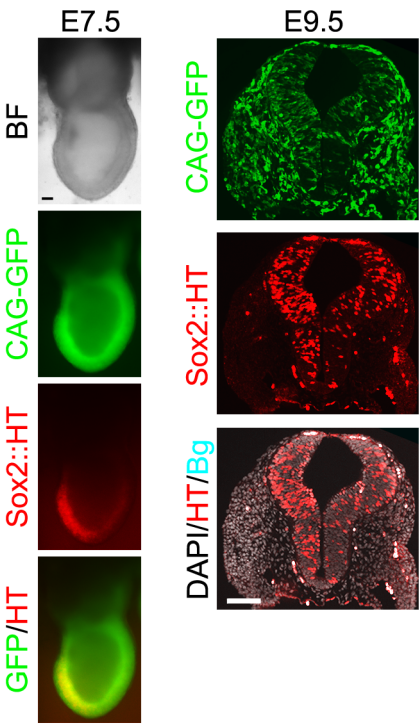

Supplement: supp [file elife_poa_e27746_Figure_1_figure_supplement_3.pdf › elife_poa_e27746_Figure_1_figure_supplement_3.pdf]

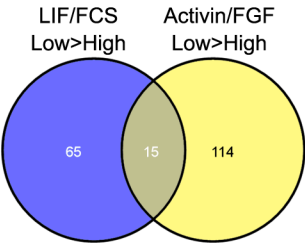

Supplement: supp [file elife_poa_e27746_Figure_1_figure_supplement_4.pdf › elife_poa_e27746_Figure_1_figure_supplement_4.pdf]

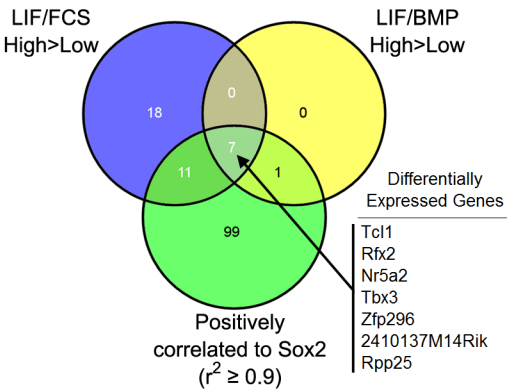

Supplement: supp [file elife_poa_e27746_Figure_1_figure_supplement_5.pdf › elife_poa_e27746_Figure_1_figure_supplement_5.pdf]

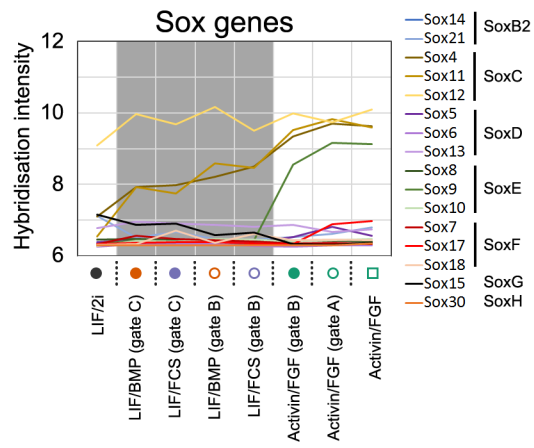

Supplement: supp [file elife_poa_e27746_Figure_1_figure_supplement_6.pdf › elife_poa_e27746_Figure_1_figure_supplement_6.pdf]

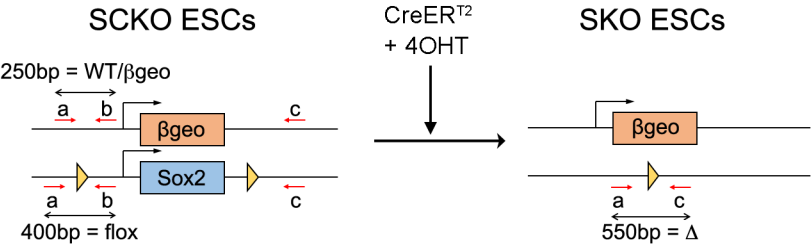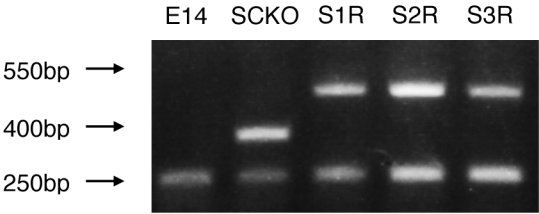

Supplement: supp [file elife_poa_e27746_Figure_2_figure_supplement_1.pdf › elife_poa_e27746_Figure_2_figure_supplement_1.pdf]

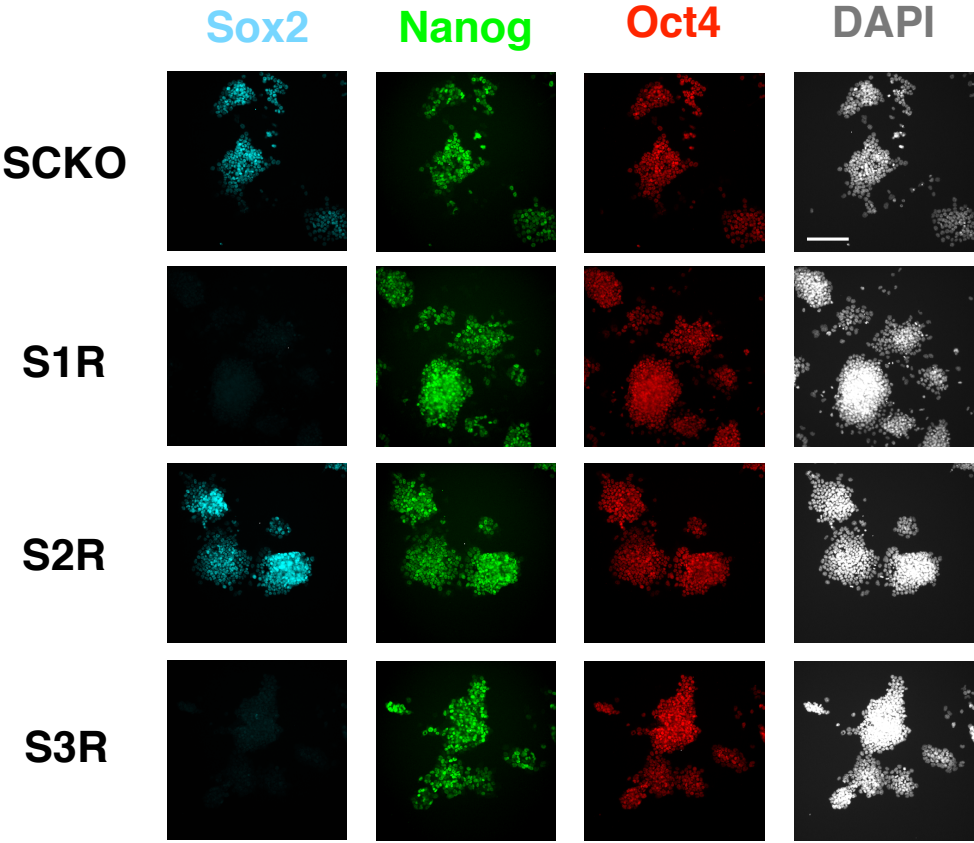

Supplement: supp [file elife_poa_e27746_Figure_2_figure_supplement_2.pdf › elife_poa_e27746_Figure_2_figure_supplement_2.pdf]

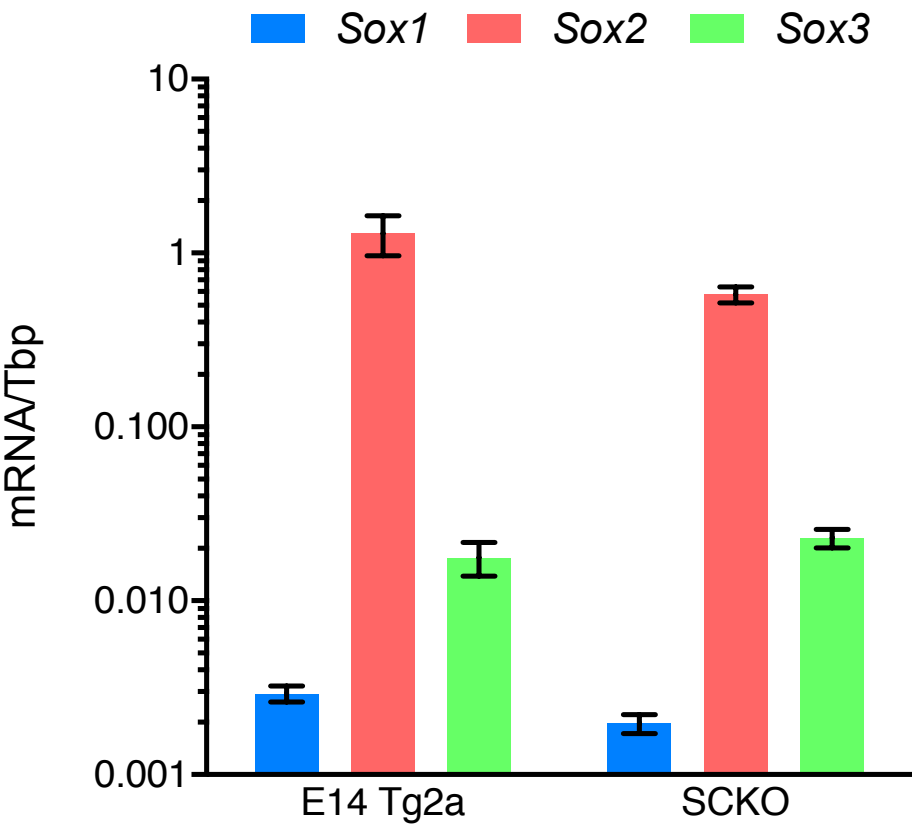

Supplement: supp [file elife_poa_e27746_Figure_3_figure_supplement_1.pdf › elife_poa_e27746_Figure_3_figure_supplement_1.pdf]

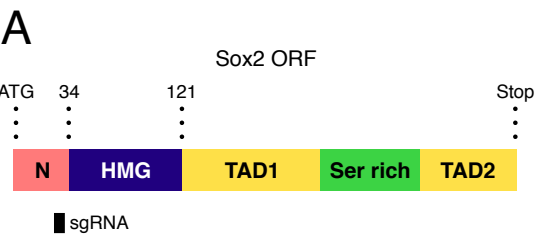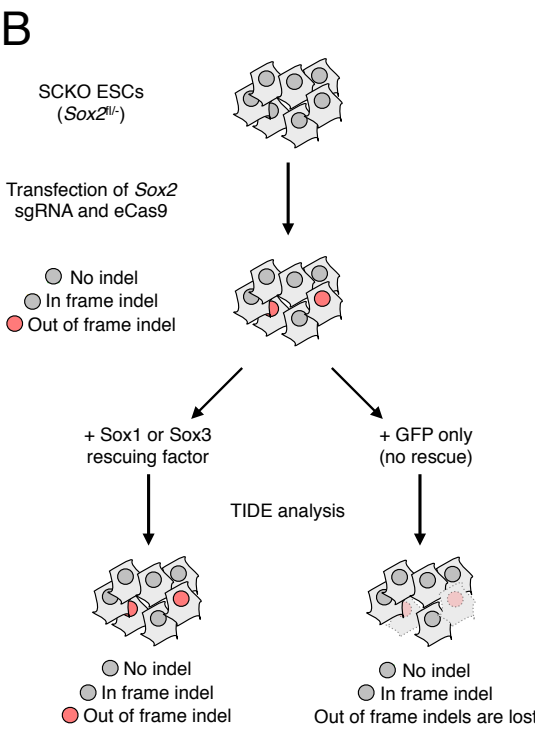

Supplement: supp [file elife_poa_e27746_Figure_5_figure_supplement_1.pdf › elife_poa_e27746_Figure_5_figure_supplement_1.pdf]

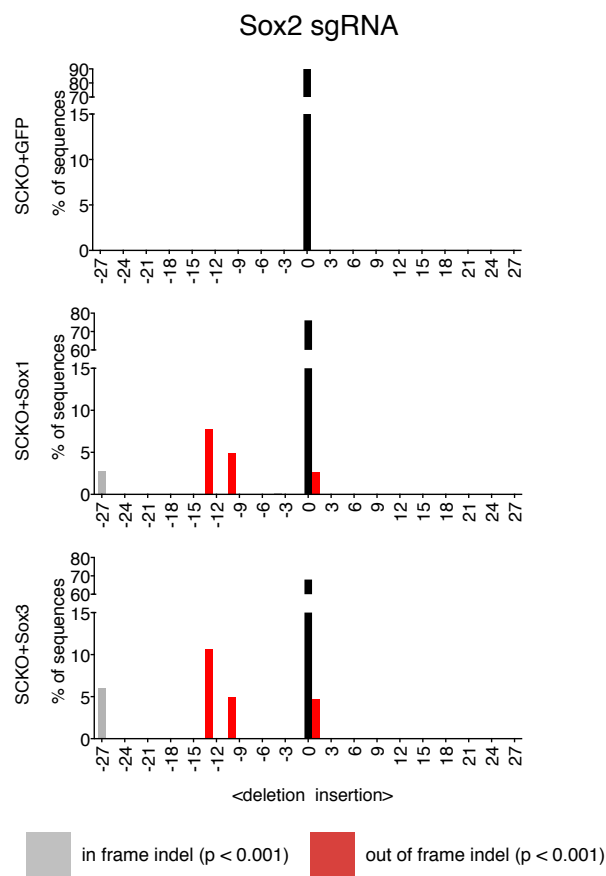

Supplement: supp [file elife_poa_e27746_Figure_5_figure_supplement_2.pdf › elife_poa_e27746_Figure_5_figure_supplement_2.pdf]

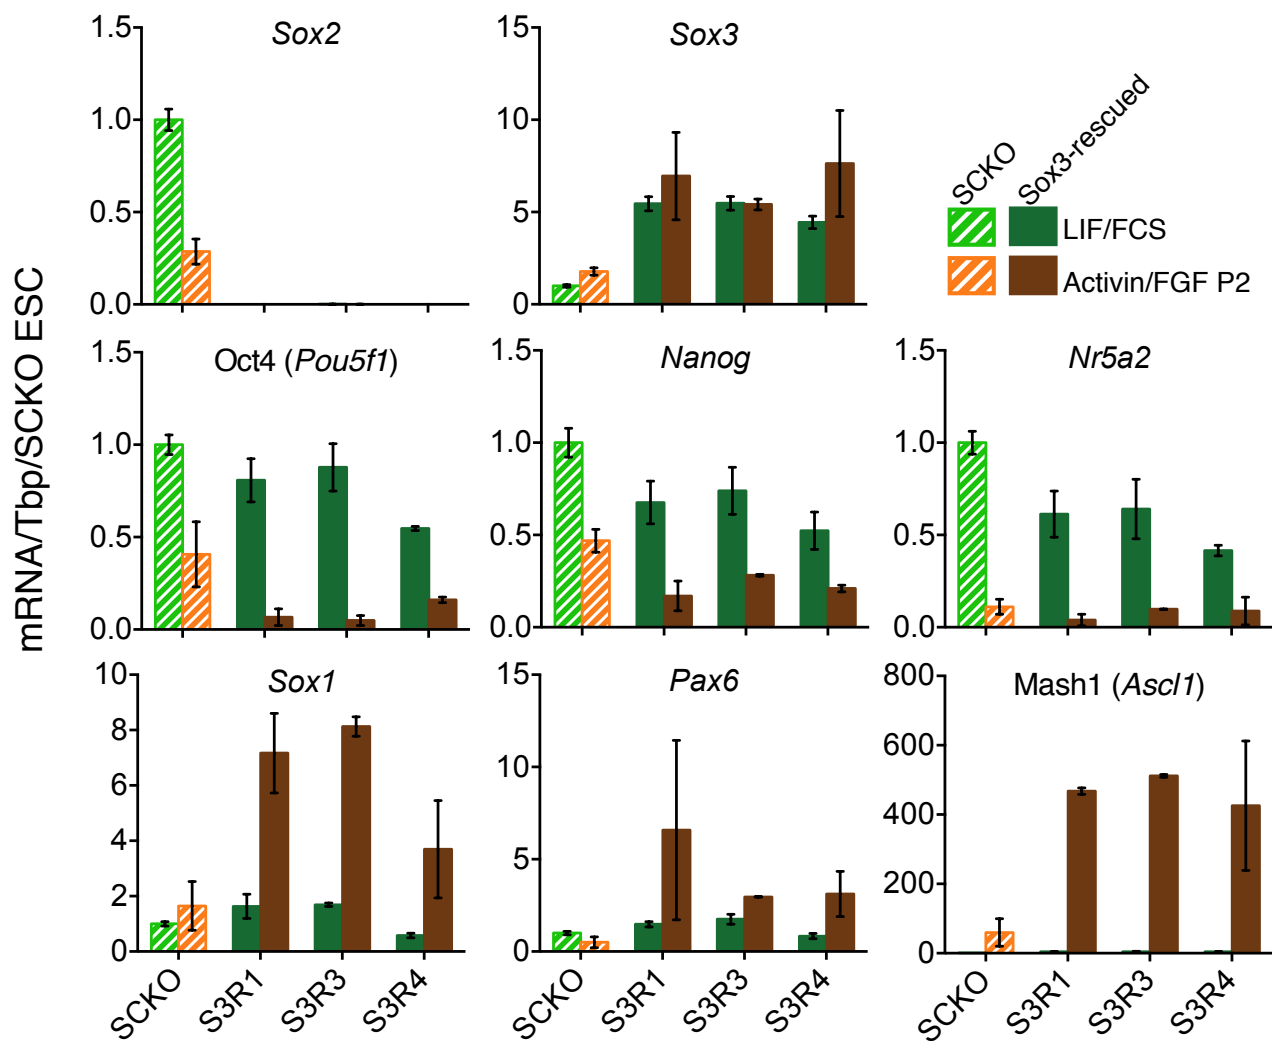

Supplement: supp [file elife_poa_e27746_Figure_6_figure_supplement_1.pdf › elife_poa_e27746_Figure_6_figure_supplement_1.pdf]

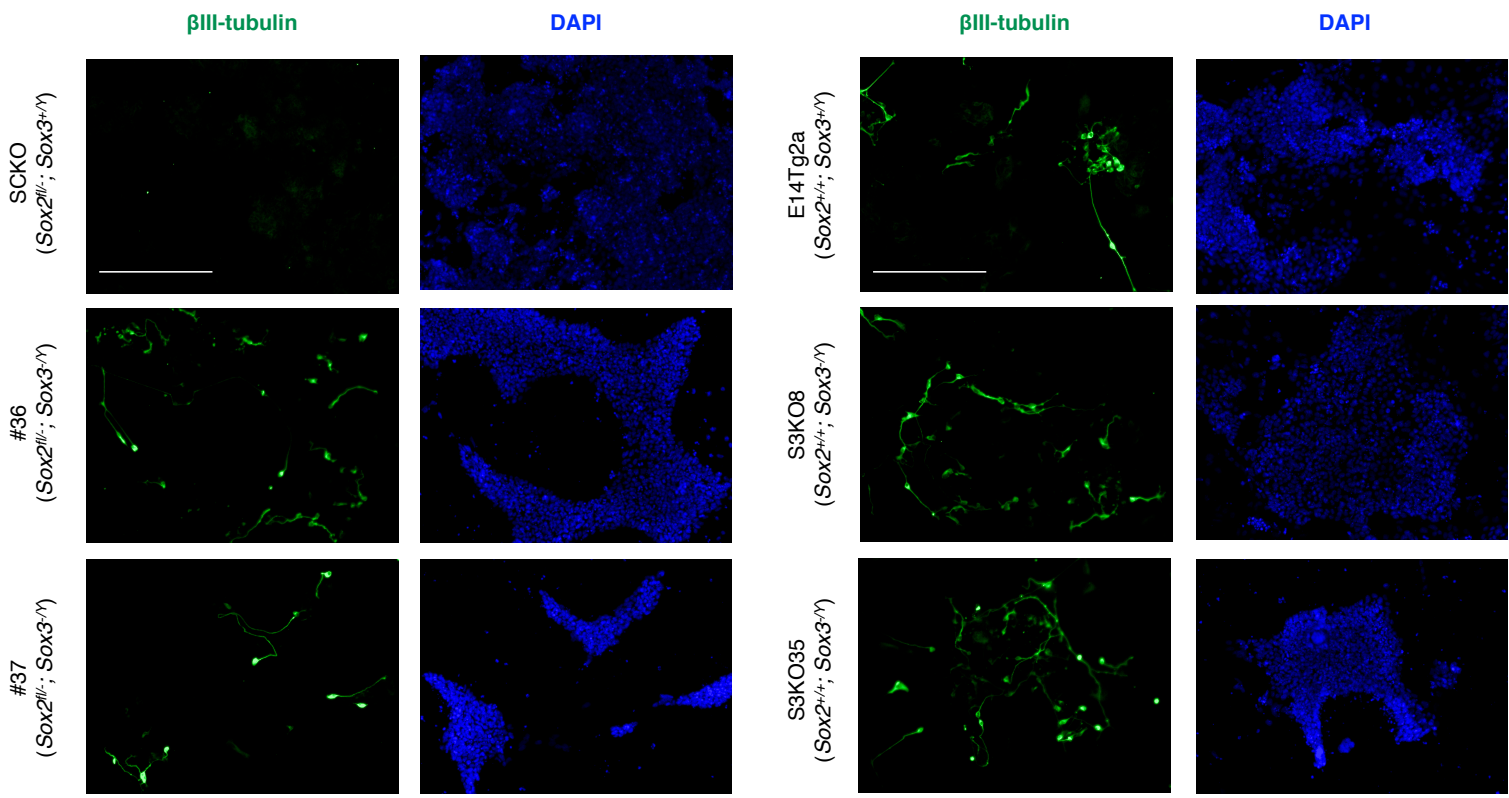

Supplement: supp [file elife_poa_e27746_Figure_8_figure_supplement_1.pdf › elife_poa_e27746_Figure_8_figure_supplement_1.pdf]

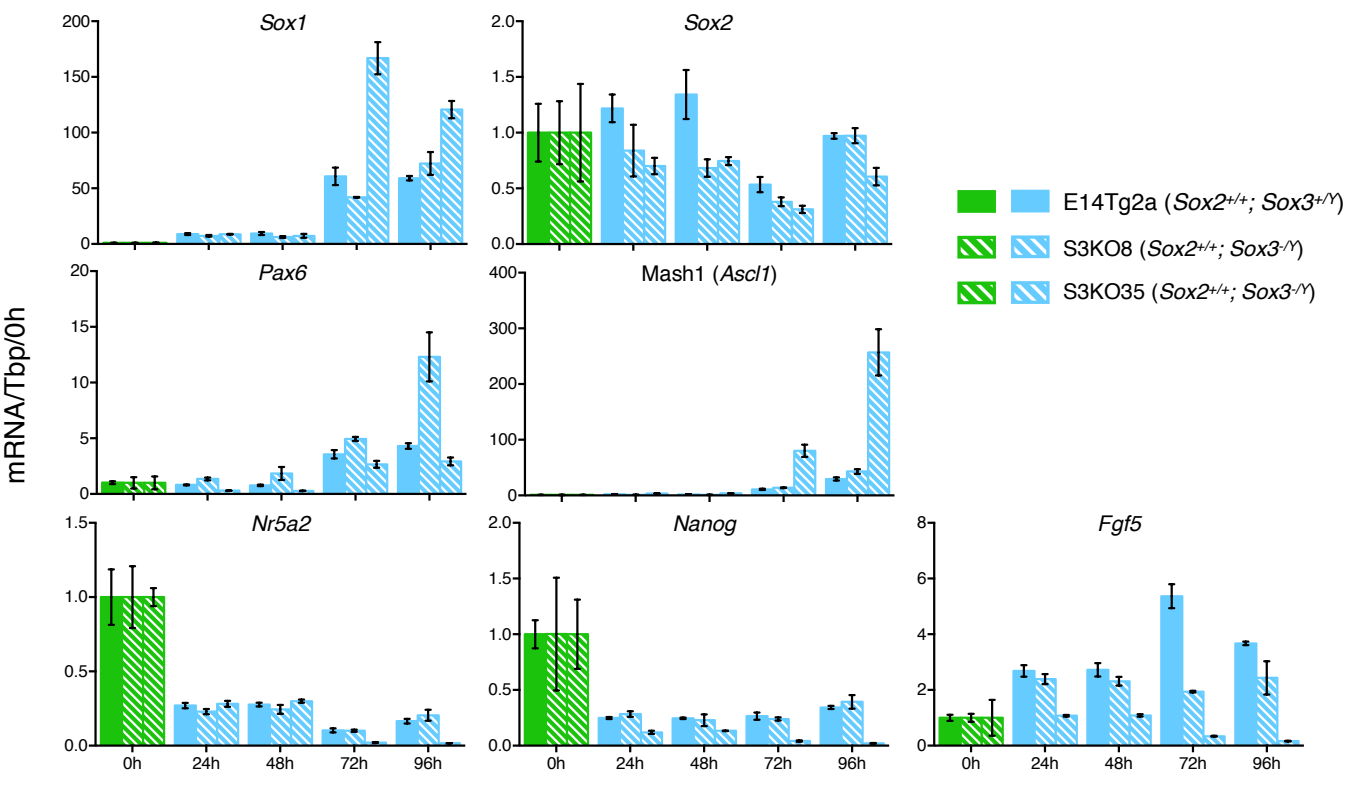

Supplement: supp [file elife_poa_e27746_Figure_8_figure_supplement_2.pdf › elife_poa_e27746_Figure_8_figure_supplement_2.pdf]
